CORRECTION

# Correction: Vitamin D and Risk of Multiple Sclerosis: A Mendelian Randomization Study

Lauren E. Mokry, Stephanie Ross, Omar S. Ahmad, Vincenzo Forgetta, George Davey Smith, David Goltzman, Aaron Leong, Celia M. T. Greenwood, George Thanassoulis, J. Brent Richards

Dr. David Goltzman is not included in the author byline. He should be listed as the sixth author and affiliated with Department of Medicine, McGill University, Montreal, Quebec, Canada. The contributions of this author are as follows: Contributed to the application of the methods and the interpretation of the findings.

The correct citation is: Mokry LE, Ross S, Ahmad OS, Forgetta V, Smith GD, Goltzman D, et al. (2015) Vitamin D and Risk of Multiple Sclerosis: A Mendelian Randomization Study. *PLoS Med* 12(8): e1001866. doi:[10.1371/journal.pmed.1001866](https://doi.org/10.1371/journal.pmed.1001866)

In addition, [Fig 2](#) is incorrect. The authors have provided a corrected version here. The direction of one arrow has been changed, and the label 'UVB' has been added.

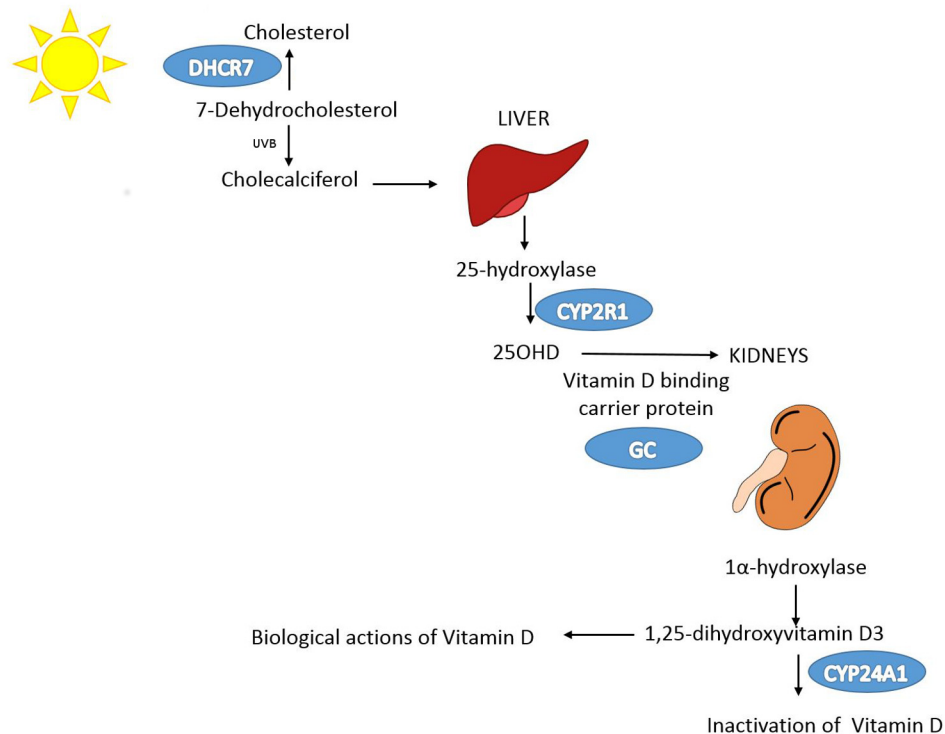

**Fig 2. Vitamin D pathway.** In blue are the genes containing, or in proximity to, SNPs that were genome-wide significant for 25OHD level in SUNLIGHT (n = 33,996). The p-values for the association with 25OHD level were  $1.9 \times 10^{-109}$  for GC,  $2.1 \times 10^{-27}$  for DHCR7,  $3.3 \times 10^{-20}$  for CYP2R1, and  $6.0 \times 10^{-10}$  for CYP24A1. Note that each gene plays an independent role in modulating the level of 25OHD. Kidney and liver images credit: <https://openclipart.org/>.

doi:[10.1371/journal.pmed.1001981.g001](https://doi.org/10.1371/journal.pmed.1001981.g001)

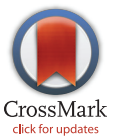

OPEN ACCESS

**Citation:** Mokry LE, Ross S, Ahmad OS, Forgetta V, Smith GD, Goltzman D, et al. (2016) Correction: Vitamin D and Risk of Multiple Sclerosis: A Mendelian Randomization Study. *PLoS Med* 13(3): e1001981. doi:[10.1371/journal.pmed.1001981](https://doi.org/10.1371/journal.pmed.1001981)

**Published:** March 2, 2016

**Copyright:** © 2016 Mokry et al. This is an open access article distributed under the terms of the [Creative Commons Attribution License](https://creativecommons.org/licenses/by/4.0/), which permits unrestricted use, distribution, and reproduction in any medium, provided the original author and source are credited.

## Reference

1. Mokry LE, Ross S, Ahmad OS, Forgetta V, Smith GD, Leong A, et al. (2015) Vitamin D and Risk of Multiple Sclerosis: A Mendelian Randomization Study. *PLoS Med* 12(8): e1001866. doi: [10.1371/journal.pmed.1001866](https://doi.org/10.1371/journal.pmed.1001866) PMID: [26305103](https://pubmed.ncbi.nlm.nih.gov/26305103/)
